# Supplementary material for: Overexpression of the double homeodomain protein DUX4c interferes with myofibrillogenesis and induces clustering of myonuclei
Source: Springer Nature journal article supplement (doi:10.1186/s13395-017-0148-4), 2018-01-12

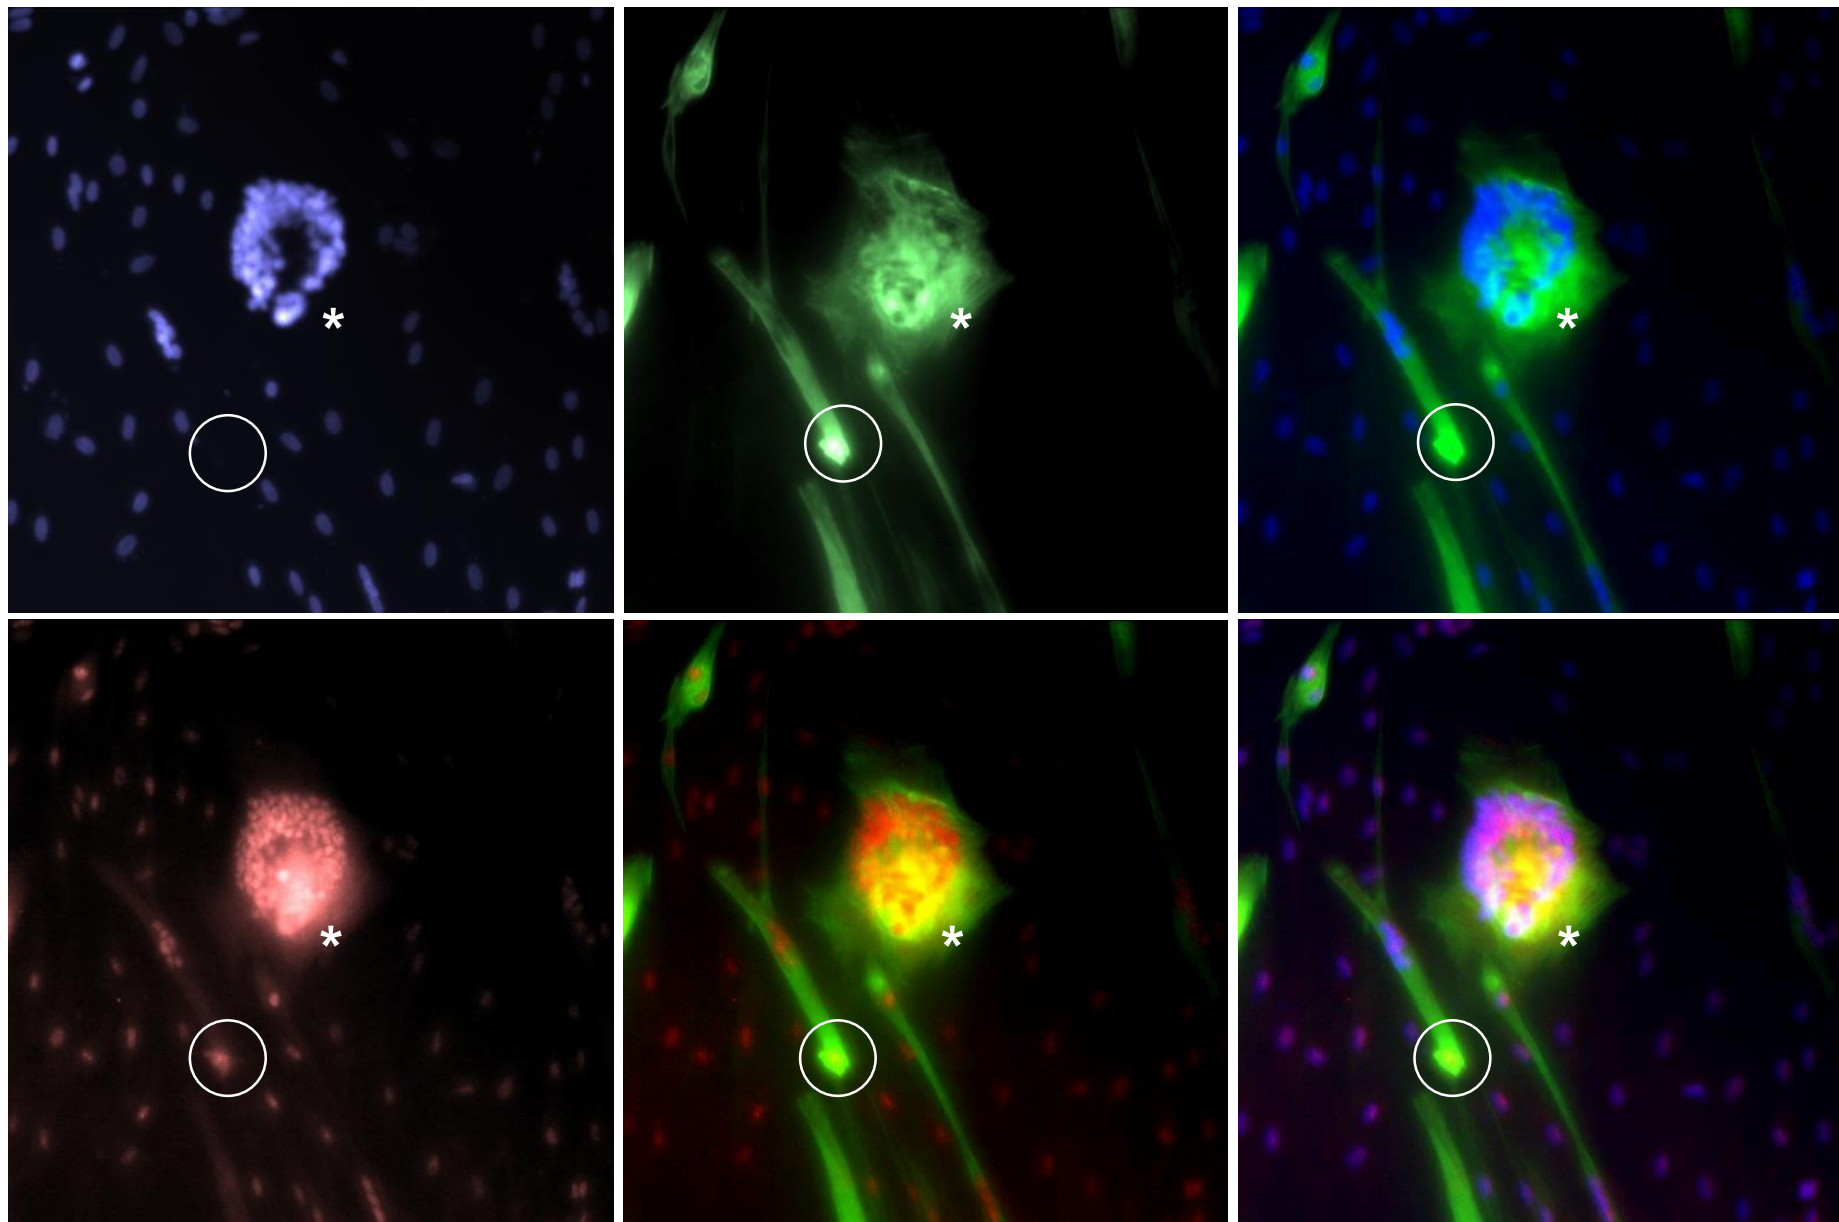

Supplement: MOESM2 [file 13395_2017_148_MOESM2_ESM.pdf]
