# Supplementary material for: Overexpression of the double homeodomain protein DUX4c interferes with myofibrillogenesis and induces clustering of myonuclei
Source: Springer Nature journal article supplement (doi:10.1186/s13395-017-0148-4), 2018-01-12
Supplement: MOESM9 [file 13395_2017_148_MOESM9_ESM.pdf]

|                                                                      |         |                                                                |      |      |    |   |      |      |    |   |      |      |    |   |      |      |    |   |
|----------------------------------------------------------------------|---------|----------------------------------------------------------------|------|------|----|---|------|------|----|---|------|------|----|---|------|------|----|---|
| Q96AQ6                                                               | PBXIP1  | Pre-B cell leukemia transcription factor-interacting protein 1 | 0.74 | 0.00 | 1  |   |      |      |    |   | 0.80 |      | 1  |   |      |      |    |   |
| P17897                                                               | TCP1    | T-complex protein 1 subunit alpha (CCT-alpha)                  |      |      |    |   | 0.84 | 0.00 | 1  |   |      |      |    |   |      |      |    |   |
| Q13409                                                               | DYNC1I2 | Cytoplasmic dynein intermediate chain 2 (DH IC-2)              |      |      |    |   | 1.01 | 0.00 | 1  |   |      |      |    |   |      |      |    |   |
| Q8TD57                                                               | DNAH3   | Dynein heavy chain 3 (Dnahc3-b)                                |      |      |    |   |      |      |    |   | ✓    |      |    |   |      |      |    |   |
| Q9UPN3                                                               | MACF1   | Microtubule-actin cross-linking factor 1 (Trabeculin-alpha)    |      |      |    |   | ✓    |      |    |   |      |      |    |   |      |      |    |   |
| <b>Actin (or associated including myofibril-associated proteins)</b> |         |                                                                |      |      |    |   |      |      |    |   |      |      |    |   |      |      |    |   |
| P60709                                                               | ACTB    | Actin, cytoplasmic 1 ( $\beta$ -actin)                         | 1.11 | N.D. | 38 |   | 1.41 | 1.43 | 21 | * | 1.13 | 1.18 | 35 | * | 1.22 | 1.17 | 22 | * |
| Q562R1                                                               | ACTBL2  | $\beta$ -actin-like protein 2 (Kappa-actin)                    | 1.03 | 1.17 | 17 |   |      |      |    |   | 1.15 | N.D. | 17 |   |      |      |    |   |
| P62736                                                               | ACTA2   | Actin, aortic smooth muscle ( $\alpha$ -actin-2)               | 1.04 | N.D. | 39 |   |      |      |    |   | 1.02 | 1.29 | 40 |   |      |      |    |   |
| P68032                                                               | ACTC1   | Actin, alpha cardiac muscle 1                                  | 1.02 | N.D. | 40 |   | 1.39 | 1.43 | 25 | * | 1.02 | 1.29 | 40 |   | 1.13 | 1.22 | 26 | * |
| Q9BYX7                                                               | ACTBM   | Putative Beta-actin-like protein 3 (Kappa actin)               |      |      |    |   |      |      |    |   | 1.12 | 1.07 | 5  | * |      |      |    |   |
| P12814                                                               | ACTN1   | $\alpha$ -actinin-1                                            | 0.94 | 1.24 | 29 |   | 1.03 | 1.32 | 22 |   | 1.04 | 1.20 | 28 |   | 1.13 | 1.27 | 20 | * |
| P35609                                                               | ACTN2   | $\alpha$ -actinin-2                                            | 0.89 | 1.18 | 14 | - | 0.97 | 1.33 | 16 |   | 0.93 | 1.29 | 15 |   | 1.01 | 1.25 | 13 |   |
| O43707                                                               | ACTN4   | $\alpha$ -actinin-4                                            | 0.87 | 1.20 | 28 | * | 1.01 | 1.24 | 20 |   | 1.11 | 1.19 | 27 | * | 1.18 | 1.26 | 19 | * |
| Q53GG5                                                               | PDLIM3  | PDZ and LIM domain protein 3 (Actinin-associated LIM protein)  |      |      |    |   | 0.63 | 0.00 | 1  |   | 1.00 | 1.32 | 3  |   | 1.07 | 0.00 | 1  |   |
| Q9NR12                                                               | PDLIM7  | PDZ and LIM domain protein 7 (Actinin-associated LIM protein)  | 0.73 | 0.00 | 1  |   | 0.81 | 1.13 | 2  |   |      |      |    |   | 1.11 | 1.16 | 2  |   |
| Q9UHB6                                                               | LIMA1   | LIM domain and actin-binding protein 1                         |      |      |    |   | 0.92 | 0.00 | 1  |   | ✓    |      |    |   | 1.33 | 1.12 | 2  |   |
| O75112                                                               | LDB3    | LIM domain-binding protein 3 (protein cypher)                  |      |      |    |   | 0.90 | 1.11 | 2  |   |      |      |    |   |      |      |    |   |
| Q9Y490                                                               | TLN1    | Talin-1                                                        | ✓    |      |    |   | ✓    |      |    |   |      |      |    |   | 0.97 | 1.08 | 2  |   |
| Q13813                                                               | SPTAN1  | Spectrin $\alpha$ chain, brain 1                               | 1.03 | 1.22 | 9  |   | 0.89 | 1.28 | 9  |   | 0.74 | 1.11 | 9  | * | 0.71 | 1.14 | 6  | * |
| Q01082                                                               | SPTBN1  | Spectrin $\beta$ chain, brain 1                                | 0.89 | 0.00 | 1  |   | 1.24 | 1.09 | 4  | * | 0.77 | 1.16 | 6  | * | 0.98 | 0.00 | 1  |   |
| P60981                                                               | DSTN    | Destrin (Actin-depolymerizing factor)                          | 1.25 | 0.00 | 1  |   |      |      |    |   | 1.12 |      | 1  |   |      |      |    |   |
| Q15511                                                               | ARPC5   | Actin-related protein 2/3 complex subunit 5 (p16-ARC)          |      |      |    |   |      |      |    |   |      |      |    |   | ✓    |      |    |   |



|        |         |                                               |      |      |    |   |      |      |    |  |      |      |    |   |      |      |    |   |
|--------|---------|-----------------------------------------------|------|------|----|---|------|------|----|--|------|------|----|---|------|------|----|---|
| Q01995 | TAGLN   | Transgelin (SM22-alpha)                       |      |      |    |   |      |      |    |  | ✓    |      |    |   |      |      |    |   |
| Q8WZ42 | TTN     | Titin                                         | 0.84 | 0.00 | 1  |   | 1.02 | 1.32 | 31 |  | 0.76 | 1.08 | 4  | * | 0.71 | 1.18 | 8  | * |
| P07951 | TPM2    | Tropomyosin $\beta$ chain (Tropomyosin-2)     | 1.12 | 1.23 | 16 | * | 1.09 | 1.27 | 8  |  | 0.95 | 1.15 | 14 |   | 1.16 | 1.16 | 4  |   |
| P09493 | TPM1    | Tropomyosin $\alpha$ -1 chain (Tropomyosin-1) | 1.13 | 1.24 | 9  |   | 1.05 | 1.30 | 6  |  |      |      |    |   | 1.19 | 1.15 | 5  | * |
| P06753 | TPM3    | Tropomyosin $\alpha$ -3 chain (Tropomyosin-3) | 1.02 | 1.26 | 5  |   |      |      |    |  | 0.96 | 1.12 | 7  |   |      |      |    |   |
| P67936 | TPM4    | Tropomyosin $\alpha$ -4 chain (Tropomyosin-4) |      |      |    |   |      |      |    |  | 1.00 | 1.10 | 6  |   | 1.28 | 1.08 | 2  |   |
| Q6WCQ1 | MPRIP   | Myosin phosphatase Rho-interacting protein    |      |      |    |   | 0.73 | 1.27 | 3  |  | 1.19 |      | 1  |   | ✓    |      |    |   |
| P29966 | MARCKS  | Myristoylated alanine-rich C-kinase substrate | 1.15 | 1.24 | 2  |   |      |      |    |  | 1.20 | 1.16 | 3  |   |      |      |    |   |
| Q0ZGT2 | NEXN    | Nexilin                                       | ✓    |      |    |   | ✓    |      |    |  | 0.98 | 1.11 | 2  |   | 1.06 | 1.16 | 3  |   |
| P63316 | TNNC1   | Troponin C, slow skeletal and cardiac muscles | 0.93 | 0.00 | 1  |   | 0.84 | 0.00 | 1  |  | 0.83 |      | 1  |   | ✓    |      |    |   |
| P19237 | TNNI1   | Troponin I, slow skeletal muscle              | 1.09 | 1.21 | 8  |   | 0.95 | 1.28 | 5  |  | 0.81 | 1.28 | 8  | * | 0.83 | 1.23 | 4  |   |
| P45379 | TNNT2   | Troponin T, cardiac muscle (TnTc)             | 1.03 | 1.19 | 5  |   | 1.23 | 1.25 | 5  |  | 0.77 | 1.19 | 5  | * | 0.96 | 1.17 | 5  |   |
| P45378 | TNNT3   | Troponin T, fast skeletal muscle (TnTf)       |      |      |    |   |      |      |    |  | 0.84 |      | 1  |   | ✓    |      |    |   |
| Q15417 | CNN3    | Calponin-3                                    | 1.29 | 0.00 | 1  |   |      |      |    |  |      |      |    |   |      |      |    |   |
| Q05682 | CALD1   | Caldesmon (CDM)                               | 1.16 | 1.18 | 5  |   | 1.06 | 1.29 | 9  |  | 1.60 | 1.24 | 3  |   | 1.54 | 1.26 | 11 | * |
| Q12797 | ASPH    | Aspartyl/asparaginyl beta-hydroxylase         |      |      |    |   |      |      |    |  | 0.73 |      | 1  |   |      |      |    |   |
| Q13884 | SNTB1   | Beta-1 syntrophin (Syntrophin-2)              | 1.08 | 0.00 | 1  |   |      |      |    |  |      |      |    |   |      |      |    |   |
| Q15149 | PLEC    | Plectin (PLTN)                                | 1.10 | 1.28 | 19 |   | 1.05 | 1.10 | 3  |  | 1.07 | 1.23 | 26 |   | 1.25 | 1.27 | 7  | * |
| P26038 | MSN     | Moesin                                        | 0.97 | 1.10 | 4  |   |      |      |    |  | 0.80 |      | 1  |   | 0.78 | 0.00 | 1  |   |
| Q702N8 | XIRP1   | Xin actin-binding repeat containing protein 1 | 0.92 | 1.17 | 9  |   | 0.95 | 1.21 | 15 |  | 0.75 | 1.19 | 10 | * | 1.02 | 1.15 | 10 |   |
| Q96I20 | PAWR    | PRKC apoptosis WT1 regulator protein          |      |      |    |   | 0.92 | 0.00 | 1  |  | ✓    |      |    |   | 1.97 | 0.00 | 1  |   |
| Q9NR64 | KLHL1   | Kelch-like protein 1                          |      |      |    |   | ✓    |      |    |  |      |      |    |   |      |      |    |   |
| O60662 | KBTBD10 | Kelch-related protein 1                       | ✓    |      |    |   |      |      |    |  |      |      |    |   | ✓    |      |    |   |

|                 |                                                                                                                                                                                                                                                    |                                          |      |      |   |  |      |      |   |  |      |      |   |  |  |  |  |
|-----------------|----------------------------------------------------------------------------------------------------------------------------------------------------------------------------------------------------------------------------------------------------|------------------------------------------|------|------|---|--|------|------|---|--|------|------|---|--|--|--|--|
| Q9Y696          | CLIC4                                                                                                                                                                                                                                              | Chloride intracellular channel protein 4 | 1.04 | 1.08 | 2 |  | 0.96 | 0.00 | 1 |  | 1.32 |      | 1 |  |  |  |  |
| P80723          | BASP1                                                                                                                                                                                                                                              | Brain acid soluble protein 1 (NAP-22)    |      |      |   |  | 0.69 | 1.22 | 3 |  | 0.89 | 1.12 | 2 |  |  |  |  |
| Q8WX93          | PALLD                                                                                                                                                                                                                                              | Palladin                                 |      |      |   |  | 1.16 | 1.13 | 5 |  |      |      |   |  |  |  |  |
| Q86TC9          | MYPN                                                                                                                                                                                                                                               | Myopalladin                              |      |      |   |  |      |      |   |  | ✓    |      |   |  |  |  |  |
| Myosin isoforms | Tassin et al 2012 (Figure 4) : in summary, the skeletal muscle myosin isoforms were decreased in aFSDH myotubes while non-muscle myosin complexes were more abundant. By contrast, myosin isoforms were not reduced in FSDH disorganized myotubes. |                                          |      |      |   |  |      |      |   |  |      |      |   |  |  |  |  |

**Cytoskeleton-associated protein quantification in healthy and FSDH myotubes : reorganization of the proteomic data presented separately in Tassin et al (2012: Figure 3, supplemental tables; and unpublished data).** Data were subdivided in the three classes of cytoskeletal proteins : actin thin filaments, intermediate filaments and microtubules. In resume, primary healthy, aFSDH (atrophic) and dFSDH (disorganized) myotubes were harvested 4 days after induction of differentiation and protein extracts (TE: total extract; NE: nuclear extract) were analysed by post-digest ICPL coupled to LC-MS/MS. UniProt accession number; Hugo Gene symbol; Protein name; H/L: fold change (✓: identified protein without quantification); SD: geometric standard deviation (n.d.: not determined when an abnormal distribution is observed); #: number of peptides used for quantification; \*: statistical significance (p<0.05) determined by Student's t-test. Proteins with an H/L ratio greater than 1.5 are highlighted in red; those with a ratio greater than 1.3 are in pink and those with a ratio greater than 1.2 are in light pink. Proteins with an H/L ratio less than 0.7 are highlighted in green and those with an H/L ratio of 0.7 - 0.8 are highlighted in light green.
