# Supplementary material for: Overexpression of the double homeodomain protein DUX4c interferes with myofibrillogenesis and induces clustering of myonuclei
Source: Springer Nature journal article supplement (doi:10.1186/s13395-017-0148-4), 2018-01-12
Supplement: MOESM11 [file 13395_2017_148_MOESM11_ESM.pdf]

|       |      |                                                        |      |       |      |                                                     |      |
|-------|------|--------------------------------------------------------|------|-------|------|-----------------------------------------------------|------|
| DUX4  | 2599 | GCCCCCTGGCTGCACCTGCCGAGTGCACAGTCCGGCTGAGGTGCACGGG      | 2648 | DUX4  | 3299 | CGCGCCTGGGGCTCTCCACAGGGGGCTTTCGTGAGCCAGGCAGCGAGGG   | 3348 |
| DUX4c | 810  | --CTCCTGGCTGCACCTGCCGAGTGCACAGCCGGCTGAGGTGCACGGG       | 857  | DUX4c | 1508 | CGCGCCTGGGGCTCTCCACAGGGGGCTTTCGTGAGCCAGGCAGCGAGGG   | 1557 |
| DUX4  | 2649 | AGCCCGCCGGCTCTCTCTGCCCGGTCCGTCCGTGAAATTCGGCCGGG        | 2698 | DUX4  | 3349 | CCGCCCCCGCGTGCAGCCAGCCAGGCCGCGCCGCGAGAGGGATCTCC     | 3398 |
| DUX4c | 858  | AGCCCGCCGGCTCTCTCTGCCCGGTCCGTCCGTGAAATTCGGCCGGG        | 907  | DUX4c | 1558 | CCGCCCCCGCGTGCAGCCAGCCAGGCCGCGCCGCGAGAGGGATCTCC     | 1607 |
| DUX4  | 2699 | GCTCACCGCGCTGCCCTCCCGACACCTTCGGACAGCACCTCCCGCGG        | 2748 | DUX4  | 3399 | CAACCTGCCCGCGCGCGGGGATTTGGCCTACGCCGCCCGGCTCCTCC     | 3448 |
| DUX4c | 908  | GCTCACCGCGCTGCCCTCCCGACACCTTCGGACAGCACCTCCCGCGG        | 957  | DUX4c | 1608 | CAACCTGCCCGCGCGCGGGGATTTGGCCTACGCCGCCCGGCTCCTCC     | 1657 |
| DUX4  | 2749 | AAGCCCGGGGACGAGGACGGCGACGGAGACTCGTTTGGACCCGAGCCAA      | 2798 | DUX4  | 3449 | GGACGGGGCGCTCTCCACCCTCAGGCTCCTCGGTGGCTCCGCACCCGG    | 3498 |
| DUX4c | 958  | AAGCCCGGGGACGAGGACGGCGACGGAGACTCGTTTGGACCCGAGCCAA      | 1007 | DUX4c | 1658 | GGACGGGGCGCTCTCCACCCTCAGGCTCCTCGGTGGCTCCGCACCCGG    | 1707 |
| DUX4  | 2799 | AGCGAGGCCCTGCGAGCCTGCTTTGAGCGGAACCCGTACCCGGGCATCGC     | 2848 | DUX4  | 3499 | GCAAAAGCCGGGAGGACCCGGACCCGAGCGCGACGGCCTGCCGGGCCCC   | 3548 |
| DUX4c | 1008 | AGCGAGGCCCTGCGAGCCTGCTTTGAGCGGAACCCGTACCCGGGCATCGC     | 1057 | DUX4c | 1708 | GCAAAAGCCGGGAGGACCCGGACCCGAGCGCGACGGCCTGCCGGGCCCC   | 1757 |
| DUX4  | 2849 | CACCAGAGAACGGCTGGCCAGGCCATCGGCATTCGGAGCCCAAGGGTCC      | 2898 | DUX4  | 3549 | TGCGCGGTGGCAGACCTGGGCCCGCTCAAGCGGGGCCGAGGGCCAAGG    | 3598 |
| DUX4c | 1058 | CACCAGAGAACGGCTGGCCAGGCCATCGGCATTCGGAGCCCAAGGGTCC      | 1107 | DUX4c | 1758 | TGCGCGGTGGCAGACCTGGGCCCGCTCAAGCGGGGCCGAGGGCCAAGG    | 1807 |
| DUX4  | 2899 | AGATTGGTTTCAGAATGAGAGGTCACGCCAGCTGAGGCAGCACCGGCGG      | 2948 | DUX4  | 3599 | GGTGCTTGCACCACCCAGTCCCAGGGGAGTCCGTGGTGGGGCTGGGGCC   | 3648 |
| DUX4c | 1108 | AGATTGGTTTCAGAATGAGAGGTCACGCCAGCTGAGGCAGCACCGGCGG      | 1157 | DUX4c | 1808 | GGTGCTTGCACCACCCAGTCCCAGGGGAGTCCGTGGTGGGGCTGGGGCC   | 1857 |
| DUX4  | 2949 | GAATCTCGGCCCTGGCCCGGAGACGCGGCCCGCCAGAAAGCCGGCGAAA      | 2998 | DUX4  | 3649 | GGGGTCCCCAGTTCGCCGGGGCGCGTGGGAACCCCAAGCCGGGGCAGCT   | 3698 |
| DUX4c | 1158 | GAATCTCGGCCCTGGCCCGGAGACGCGGCCCGCCAGAAAGCCGGCGAAA      | 1207 | DUX4c | 1858 | GGGGTCCCCAGTTCGCCGGGGCGCGTGGGAACCCCAAGCCGGGGCAGCT   | 1907 |
| DUX4  | 2999 | GCGGACCCCGCTACCCGGATCCAGACCCCGCTGCTCCTCCGAGCCTTTG      | 3048 | DUX4  | 3699 | CCACCTCCCCAGCCCGCGCCCGGACGCCTCCGCCTCCGCGGGCAGGG     | 3748 |
| DUX4c | 1208 | GCGGACCCCGCTACCCGGATCCAGACCCCGCTGCTCCTCCGAGCCTTTG      | 1257 | DUX4c | 1908 | CCACCTCCCCAGCCCGCGCCCGGACGCCTCCGC-----GGCAAGC       | 1949 |
| DUX4  | 3049 | AGAAGGATCGCTTTCAGGCATCGCCCGCGGAGGAGCTGGCCAGAGAG        | 3098 | DUX4  | 3749 | GCAGATGCAAGGCATCCCGCGCCCTCCAGGCCTCCAGGAGCCGGCGC     | 3798 |
| DUX4c | 1258 | AGAAGGATCGCTTTCAGGCATCGCCCGCGGAGGAGCTGGCCAGAGAG        | 1307 | DUX4c | 1950 | ACAGATGCCAGGCATCCAGGCCTCCCAACCGCTCCAGGAGCCGGGGC     | 1998 |
| DUX4  | 3099 | ACGGGCTCCCGGATCCAGGATTCAGATCTCGTTTTCAGAATCGAAGGGC      | 3148 | DUX4  | 3799 | CCTGGTCTGCATCCCTCGCGCTGCTGCTGGATGAGCTCCTGGCGAGC     | 3848 |
| DUX4c | 1308 | ACGGGCTCCCGGATCCAGGATTCAGATCTCGTTTTCAGAATCGAAGGGC      | 1357 | DUX4c | 1999 | GCTCGTCTACAGTACCTCCAGCCTGTTA---TATGAGCTCTGACA       | 2045 |
| DUX4  | 3149 | CAGGCACCCGGGACAGGGTGGCAGGGCCCGCGCAGGCAGGCAGCGCCTGT     | 3198 | DUX4  | 3849 | CCGGAGTTTCTGCAGCAGGGCCAACTCTCCTAGAAACGGAGGCCCGGGG   | 3898 |
| DUX4c | 1358 | CAGGCACCCGGGACAGGGTGGCAGGGCCCGCGCAGGCAGGCAGGCAGCGCCTGT | 1407 | DUX4c | 2046 | CCAGAGTTTTCAGCAAAGGCACGACCTTCTCCTAGATCCGGCGCCACTGGG | 2095 |
| DUX4  | 3199 | GCAGCGGGCCCCCGGGGGTTCACCTTGCTCCCTCGTGGGTGCCTTC         | 3248 | DUX4  | 3899 | GGAGCTGGAGGCTCGGAAGAGGCCCGCTCGTGGAAAGCACCCTCAGCG    | 3948 |
| DUX4c | 1408 | GCAGCGGGCCCCCGGGGGTTCACCTTGCTCCCTCGTGGGTGCCTTC         | 1457 | DUX4c | 2096 | GGAGCTGAAGGACGTGGAAGAGCCCGCTCGTGGAAACCACTCCTCAGCG   | 2145 |
| DUX4  | 3249 | GCCCACACGGCGCTGGGGAACGGGGCTTCCCGCACCCACAGTGCCTTG       | 3298 | DUX4  | 3949 | AGGAAGAATACCGGGCTCTGCTGGAGGAGCTTACGACGCGGGGTGGGA    | 3998 |
| DUX4c | 1458 | GCCCACACGGCGCTGGGGAACGGGGCTTCCCGCACCCACAGTGCCTTG       | 1507 | DUX4c | 2146 | AGGAAGAACACCGGGCTCTGCTGGAGGAGAGGTTGGAGCGGGTGGGG     | 2195 |

*BglII*
